# Supplementary material for: A Positive Feedback Loop Links Opposing Functions of P-TEFb/Cdk9 and Histone H2B Ubiquitylation to Regulate Transcript Elongation in Fission Yeast
Source: PubMed Central journal article supplement (PMC3410854; doi:10.1371/journal.pgen.1002822), 2012-08-02

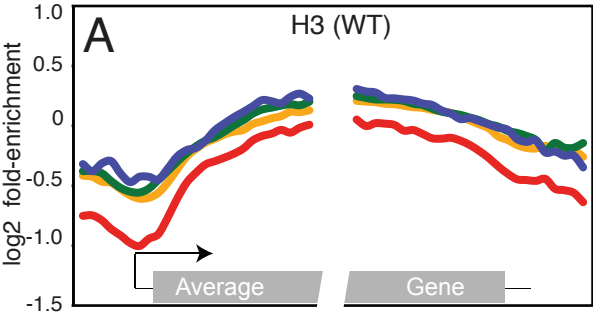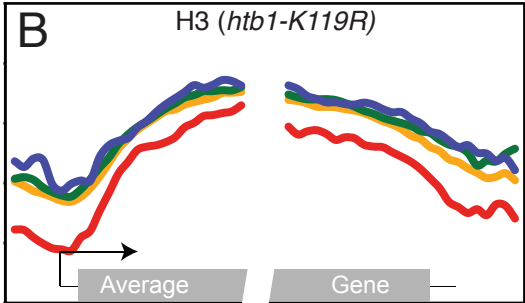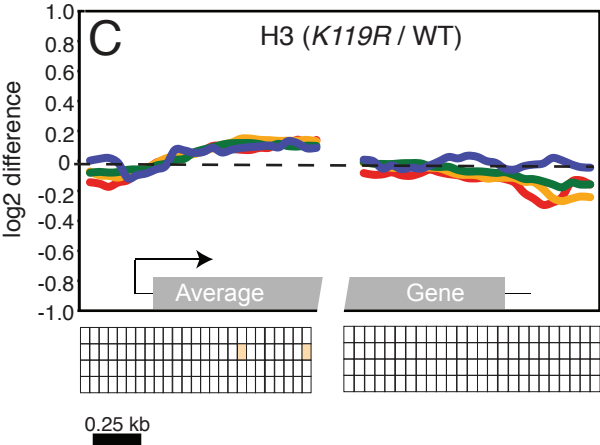

Supplement: pgen.1002822.s007.pdf [file pgen.1002822.s007.pdf]
